# Supplementary material for: XPRESSyourself: Enhancing, standardizing, and automating ribosome profiling computational analyses yields improved insight into data
Source: PubMed Central journal article supplement (PMC7015430; doi:10.1371/journal.pcbi.1007625), 2020-01-31
Supplement: pcbi.1007625.s003.pdf [file pcbi.1007625.s003.pdf]

---

# **xpressplot Documentation**

*Release 0.2.2*

**Jordan A. Berg**

**Oct 29, 2019**



---

## Contents

---

|          |                                               |           |
|----------|-----------------------------------------------|-----------|
| <b>1</b> | <b>About</b>                                  | <b>3</b>  |
| <b>2</b> | <b>Table of contents</b>                      | <b>5</b>  |
| 2.1      | Wait! I've never programmed before! . . . . . | 5         |
| 2.2      | Installation . . . . .                        | 7         |
| 2.3      | General Usage . . . . .                       | 8         |
| 2.4      | Retrieving Data . . . . .                     | 8         |
| 2.5      | Normalization and Quality Control . . . . .   | 17        |
| 2.6      | Analysis . . . . .                            | 24        |
| 2.7      | Updates . . . . .                             | 43        |
| <b>3</b> | <b>License</b>                                | <b>45</b> |
| <b>4</b> | <b>Questions?</b>                             | <b>47</b> |







# CHAPTER 1

---

## About

---

**XPRESSplot** is a part of the **XPRESSyourself** suite of sequencing tools. **XPRESSplot** is a Python toolkit for navigating and analyzing gene expression (Microarray or RNAseq) datasets. Features include the ability to import GEO-accessible datasets and metadata or your own datasets, clean, normalize, and analyze sequence data.

**XPRESSplot** and the **XPRESSyourself** suite is developed and maintained by Jordan Berg in the **Rutter Lab** @ the **University of Utah**, along with other collaborators.





## 2.1 Wait! I've never programmed before!

If you don't have any programming experience and find this all very daunting, this is the documentation for you! We will walk through installation and usage step by step, and explain what we are doing along the way.

### 2.1.1 Installation

Installation requires the use of the command line interface (CLI). If you would like some background on how this programming environment works, you can try the [Codecademy module](#) which will familiarize you with this language. To begin, you will need to install the software package, xpressplot. To do so, we will use a Package Manager which will ease the overhead involved in installing software and other software packages it relies on.

1. We will need to use the command line interface (CLI, also known as the Terminal) to install and begin using the software
  - Linux: Press Ctrl + Alt + T on your keyboard and the Terminal will open
  - Mac: Click on the Finder icon (a magnifying glass) at the top right corner of your Desktop, type in Terminal, and double-click the corresponding icon
2. We recommend using Python3 as Python2 is being deprecated (will no longer be updated, debugged, etc)
  - You can check the version of Python you have by typing `python -v` in the command line
  - If you only have Python2 installed and want to use Python3, you can download [this here](#)
  - Now we need the computer to recognize Python3 as the default Python by typing `newalias() {echo "python=python3" >> $HOME/.bash_aliases; source ~/.bash_aliases; }`
  - Now we can test this by executing `python -v` again
3. With newer versions of Python, the package manager PyPi should already be installed. We can install xpressplot by executing the following: `pip install xpressplot`. This should install xpressplot and all dependencies.
4. Let's test that the installation worked:

```
$ python
```

This will open the python interactive mode. Next, type the following:

```
>>> import xpressplot
```

If the command executes without error, xpressplot and all dependencies have been successfully installed.

NOTE: If any installation up to this point fails due to privileges warnings, you should run the pip install or other command using `sudo`. You will append this to the beginning of the command and will likely be asked to provide your account password for your machine. `sudo` means “substitute user do”, which essentially tells your computer you are a authorized user to install software on the system.

### 2.1.2 Use

Assuming you are a beginner user, you will likely want to run the interactive notebook. This has many example functions you can run with a toy dataset, which can be easily modified for your use. Instructions are provided with each block of code. In order to run this interactive notebook, we will need Jupyter Notebook, which is automatically installed with the Anaconda package manager

1. Let's install Anaconda

- The version you install depends on the version of Python you are using
- Follow this [link](#) to install the appropriate version of Anaconda

2. Let's check that Anaconda installed correctly:

```
$ conda update conda
```

3. Now, let's update Jupyter notebook

```
$ conda install jupyter
```

4. Now we can open Jupyter notebook:

```
$ cd /path/to/notebook/
```

This process of navigating to the directory with the notebook can be made easy by typing `:data:cd` and dragging and dropping the directory icon to the CLI and pressing Enter

```
$ jupyter notebook
```

This will launch a browser window with Jupyter. Now we can open the `example_notebook.ipynb` file and start running the analysis.

Execute blocks of code in the Jupyter Notebook by pressing Shift + Enter

And that's about it! Feel free to submit any issues you have [here](#). It is helpful to copy and paste any errors that appear or the lines of code you are struggling with.

## 2.2 Installation

### 2.2.1 PyPi Install

1) Install xpressplot and associated dependencies via pip:

```
$ pip install xpressplot
```

### 2.2.2 Conda Install

This feature is not yet available...

1) Install xpressplot and associated dependencies via conda:

```
$ conda install -y -c bioconda xpressplot
```

### 2.2.3 Manual install

1) Or download xpressplot manually:

```
$ git clone https://github.com/XPRESSyourself/xpressplot.git
$ cd xpressplot
$ cd python setup.py install
```

2) Or, to download specific version:

```
$ tag='v0.0.1-beta'
$ wget https://github.com/XPRESSyourself/xpressplot/archive/$tag.zip
$ unzip xpressplot-${tag:1}.zip
$ mv xpressplot-${tag:1} xpressplot
$ cd xpressplot
$ cd python setup.py install
```

3) At the end of the installation instructions, an installation location will be given. Add this to your \$PATH:

```
...
Installing xpressplot script to /Users/$USERNAME/anaconda3/bin

Installed /Users/$USERNAME/anaconda3/lib/python3.6/site-packages/xpressplot-0.0.1b0-
↳py3.6.egg
Processing dependencies for xpressplot==0.0.1b0
Finished processing dependencies for xpressplot==0.0.1b0

$ echo "export PATH='/Users/$USERNAME/anaconda3/bin:$PATH' >> ~/.bash_profile
```

## 2.3 General Usage

xpressplot is intended as a all-in-one toolkit and interface for analysis of sequencing data

### 2.3.1 Sequence Data

Required format for all functions (unless otherwise noted in documentation).

```
>>> geo.head()
          GSM523242  GSM523243  GSM523244  GSM523245  GSM523246  GSM523247  ...
1007_s_at  8.98104    8.59941    8.25395    8.72981    8.70794    8.10693  ...
1053_at    5.84313    6.59168    8.27881    6.64005    4.65107    7.19090  ...
121_at     6.17189    5.73603    5.55673    5.69374    6.77618    5.84524  ...
1294_at    6.97009    6.80003    5.56620    7.43816    7.36375    5.85687  ...
1405_i_at  10.24611   10.13807    8.84743    9.72365   10.42940    9.17510  ...
```

### 2.3.2 Metadata

Required format for all functions (unless otherwise noted in documentation).

```
>>> geo.head()
   0          1
0  GSM523242  mucosa_normal_colon_1 (micro)
1  GSM523243  mucosa_normal_colon_2 (micro)
2  GSM523244  mucosa_adenoma_3 (micro)
3  GSM523245  colonic_crypt_epithelial_cells_normal_colon_4 ...
4  GSM523246  mucosa_normal_colon_5 (micro)
```

## 2.4 Retrieving Data

### 2.4.1 Importing Data from File

`xpressplot.get_df ( file_name, delimiter=',', low_memory=False, gene_axis='row' )`

Purpose:

Get sequence dataframe from user-provided file.

Assumptions:

- Dataset does not contain axis labels (i.e. a column header for 'gene names')
- Dataset only has gene names and sample\_ids as column headers and row indices. Orientation is flexible, but needs to be specified in options if genes are not rows
- If orientation is not default, it is then specified or else function will not be able to properly format the dataframe for downstream application

Parameters:

**file\_name:** Full path of file to import into pandas dataframe

**delimiter:** Delimiter type for importing file, default: ','

**low\_memory:** Specify memory limits for importing large files, default: False (allows for large imports)

**gene\_axis:** Orientation of the data, where categorical data is either column-wise, (default: 'col') or row-wise ('row'). Case insensitive

Returns:

**data:** Pandas dataframe with data matrix

Examples:

```
> import pandas as pd
> import xpressplot as xp
> data = xp.get_df('/path/to/data.csv')
> data
```

|           | GSM523242 | GSM523243 | GSM523244 | GSM523245 | ... |
|-----------|-----------|-----------|-----------|-----------|-----|
| 1007_s_at | 8.98104   | 8.59941   | 8.25395   | 8.72981   | ... |
| 1053_at   | 5.84313   | 6.59168   | 8.27881   | 6.64005   | ... |
| 121_at    | 6.17189   | 5.73603   | 5.55673   | 5.69374   | ... |
| 1294_at   | 6.97009   | 6.80003   | 5.56620   | 7.43816   | ... |
| ...       | ...       | ...       | ...       | ...       | ... |

## 2.4.2 Importing metadata from file

`xpressplot.get_info ( file_name, delimiter=",", axis="col", sample_ids=0, labels=1 )`

Purpose:

Get sample metadata from user-provided file

Assumptions:

- \* Data categories are not labeled
- \* If orientation is not default, it is then specified or else function will not be able to properly format the dataframe for downstream application

Parameters:

**file\_name:** full path of file to import into pandas dataframe

**delimiter:** delimiter type for importing file, default: ','

**axis:** Orientation of the data, where categorical data is either column-wise, (default: 'col') or row-wise ('row'). Case insensitive

**sample\_ids:** Column or row number where sample IDs are found (default: 0)

**labels:** Column or row number where categorical label data are found (default: 1)

Returns:

**metadata:** Pandas dataframe with metadata

Examples:

```
> import pandas as pd
> import xpressplot as xp
> metadata = xp.get_info('/path/to/metadata.csv')
> metadata
   0      1
0  GSM523242  mucosa_normal_colon
1  GSM523243  mucosa_normal_colon
2  GSM523244  mucosa_adenoma
3  GSM523245  colonic_crypt_epithelial_cells_normal_colon
... ..
```

## 2.4.3 Importing data from GEO

### RNAseq Datasets

A module will be added in the future to automate this conversion and import from GEO

Download the csv or tsv file provided in supplement and ensure formatted follows xpressplot standards

Sometimes the delimiter is formatted incorrectly. If so, a simple find/replace can be used to replace the incorrect delimiter with a t

Remove the gene name column header, but keep the trailing tab

Create a metadata file following xpressplot standards

Import data

### MicroArray Datasets

**xpressplot.get\_geo ( geo\_id, output\_info=False )**

Purpose:

Get sample data and metadata from a GEO database

Parameters:

**geo\_id:** GEO ID for dataset of interest, input is case insensitive (ex: GSE20716)

**output\_info:** Output long-form metadata to txt file if True (default: False)

Returns:

**data:** Pandas dataframe with data matrix

**metadata:** Pandas dataframe with metadata

Examples:

```
> import pandas as pd
> import xpressplot as xp
> data, metadata = xp.get_geo('GSE20916')
> data
      GSM523242 GSM523243 GSM523244 GSM523245 ...
1007_s_at    8.98104   8.59941   8.25395   8.72981 ...
1053_at      5.84313   6.59168   8.27881   6.64005 ...
121_at       6.17189   5.73603   5.55673   5.69374 ...
1294_at      6.97009   6.80003   5.56620   7.43816 ...
...          ...      ...      ...      ...      ...
> metadata
   0  1
0  GSM523242 mucosa_normal_colon
1  GSM523243 mucosa_normal_colon
2  GSM523244 mucosa_adenoma
3  GSM523245 colonic_crypt_epithelial_cells_normal_colon
... ..
```

## 2.4.4 Catenate Raw Counts Files

`xpressplot.catenate_files ( directory, file_suffix='txt', save_file=None, delimiter='t', drop_rows=0 )`

Purpose:

Compiles expression counts from multiple files into one table. For example, HTSeq-count outputs each alignment file's counts as a separate count file. This module will collect all single count files and compile them into a single count table.

Assumptions:

- File length of each is the same and ordered the same (same genes in the same order)
- Files to parse are expected to be header-less and column[0] should be gene identifiers and column[1] should be expression values

Parameters:

**directory:** Path to directory containing raw counts files (only tested currently with HTSeq-count output files)

**file\_suffix:** Common suffix of all count files (default: 'txt'). This feature is useful for modification if there other files in the directory that are not count files, as if they do not contain the same suffix, they will not be used in the function.

**save\_file:** Include if you want the resulting counts table saved for later use (default: None)

**delimiter:** Delimiter style for expression files, will also output files if saved in this same format

**drop\_rows:** Number of rows to drop from the end of each count file. HTSeq-count provides 5 lines of summary statistics at the end of each file, so for HTSeq-count files, use `drop_rows=5`

Returns:

**count\_table:** Pandas dataframe with the catenated counts. Samples are along columns, genes are along rows

Examples:

```
> counts = xp.catenate_files(count_dir, file_suffix='counts.txt', drop_rows=5)
> counts
      S1_counts.txt S2_counts.txt S3_counts.txt S4_counts.txt
Gene1      66          59           1           82
Gene2      35           0           7           72
Gene3      20          70          87           78
Gene4      96           7          93           38
...         ...         ...         ...         ...
```

## 2.4.5 Create Count Table from File List

`xpressplot.count_table ( file_list, gene_column=0, sample_column=1, sep='t', drop_rows=5 )`

Purpose:

Collate HTseq counts files (similar to `catenate_files()`, but input is a file list)

Assumptions:

- No headers are included in the count files

Parameters:

**file\_list**: List of files with the path names appended to each file to be collated into a single count table

**gene\_column**: Column location in all count files of gene names

**sample\_column**: Column location in all count files of samples

**sep**: Separator of counts files

**drop\_rows**: Number of rows to drop from the end of each count file. HTSeq-count provides 5 lines of summary statistics at the end of each file, so for HTSeq-count files, use `drop_rows=5`

Returns:

**count\_table**: Pandas dataframe with the catenated counts. Samples are along columns, genes are along rows

## 2.4.6 Drop Samples

`xpressplot.drop_samples ( data, ids )`

Purpose:

Drop samples by sample IDs – pass in a list of names

Assumptions:

- Dataframe axes have been properly formatted (samples are columns, genes are rows)

Parameters:

**data**: Dataframe containing expression data

**ids**: List of sample IDs to remove from the dataframe

Returns:

**data**: Pandas dataframe with modified data matrix



Examples:

```
> data
      GSM523242 GSM523243 GSM523244 GSM523245 ...
1007_s_at    8.98104   8.59941   8.25395   8.72981   ...
1053_at      5.84313   6.59168   8.27881   6.64005   ...
121_at       6.17189   5.73603   5.55673   5.69374   ...
1294_at      6.97009   6.80003   5.56620   7.43816   ...
...          ...      ...      ...      ...      ...
> data = xp.drop_samples(data, metadata, ['GSM523244'])
> data
      GSM523242 GSM523243 GSM523245 ...
1007_s_at    8.98104   8.59941   8.72981   ...
1053_at      5.84313   6.59168   6.64005   ...
121_at       6.17189   5.73603   5.69374   ...
1294_at      6.97009   6.80003   7.43816   ...
...          ...      ...      ...      ...
```

## 2.4.7 Drop label

**xpressplot.drop\_label ( data, info, label )**

Purpose:

Drop samples by label group name

Assumptions:

- Dataframe axes have been properly formatted (samples are columns, genes are rows)
- Only one string is given to drop per call instance of function

Parameters:

**data:** Dataframe containing expression data

**info:** Dataframe containing sample information data

**label:** Name of sample type to drop (string)

Returns:

**data:** Pandas dataframe with modified data matrix

Examples:

```
> data
      GSM523242 GSM523243 GSM523244 GSM523245 ...
1007_s_at    8.98104   8.59941   8.25395   8.72981   ...
1053_at      5.84313   6.59168   8.27881   6.64005   ...
121_at       6.17189   5.73603   5.55673   5.69374   ...
1294_at      6.97009   6.80003   5.56620   7.43816   ...
...          ...      ...      ...      ...      ...
> data = xp.drop_label(data, metadata, 'mucosa_adenoma')
```

(continues on next page)

(continued from previous page)

```
> data
      GSM523242 GSM523243 GSM523245 ...
1007_s_at    8.98104  8.59941  8.72981  ...
1053_at      5.84313  6.59168  6.64005  ...
121_at       6.17189  5.73603  5.69374  ...
1294_at      6.97009  6.80003  7.43816  ...
...          ...      ...      ...      ...
```

## 2.4.8 Keep labels

**xpressplot.keep\_labels ( data, info, label\_list=None )**

Purpose:

Keep samples by list of label names

Assumptions:

- Dataframe axes have been properly formatted (samples are columns, genes are rows)
- Labels provided are in list format

Parameters:

**data:** Dataframe containing expression data

**info:** Dataframe containing sample information data

**labels:** List of sample types to keep

Returns:

**data:** Pandas dataframe with modified data matrix

Examples:

```
> data
      GSM523242 GSM523243 GSM523244 GSM523245 ...
1007_s_at    8.98104  8.59941  8.25395  8.72981  ...
1053_at      5.84313  6.59168  8.27881  6.64005  ...
121_at       6.17189  5.73603  5.55673  5.69374  ...
1294_at      6.97009  6.80003  5.56620  7.43816  ...
...          ...      ...      ...      ...      ...
> data = xp.keep_labels(data, metadata, ['mucosa_normal_colon', 'mucosa_adenoma'])
> data
      GSM523242 GSM523243 GSM523244 ...
1007_s_at    8.98104  8.59941  8.25395  ...
1053_at      5.84313  6.59168  8.27881  ...
121_at       6.17189  5.73603  5.55673  ...
1294_at      6.97009  6.80003  5.56620  ...
...          ...      ...      ...      ...
```

## 2.4.9 Rename dataframe column names

**xpressplot.rename\_cols ( data, converters )**

**Purpose:**

Rename column names using dataframe

**Parameters:**

**data:** Dataframe to rename column names

**converters:** Dataframe where column 0 contains old names and column 1 contains new names

**Returns:**

**data:** Pandas dataframe with modified data matrix

**Examples:**

```
> data
      GSM523242 GSM523243 GSM523244 GSM523245 ...
1007_s_at    8.98104   8.59941   8.25395   8.72981 ...
1053_at      5.84313   6.59168   8.27881   6.64005 ...
121_at       6.17189   5.73603   5.55673   5.69374 ...
1294_at      6.97009   6.80003   5.56620   7.43816 ...
...          ...          ...          ...          ...

> conversion_table
   0      1
0  GSM523242 normal
1  GSM523244 adenoma
2  GSM523245 normal

> data = xp.rename_cols(data, conversion_table)
> data
      normal GSM523243 adenoma normal ...
1007_s_at    8.98104   8.59941   8.25395   8.72981 ...
1053_at      5.84313   6.59168   8.27881   6.64005 ...
121_at       6.17189   5.73603   5.55673   5.69374 ...
1294_at      6.97009   6.80003   5.56620   7.43816 ...
...          ...          ...          ...          ...
```

## 2.4.10 Rename genes with GTF

**xpressplot.convert\_names\_gtf** ( **data**, **gtf**, **orig\_name\_label='gene\_id'** , **orig\_name\_location=0**, **new\_name\_label='gene\_name'** , **new\_name\_location=1**, **refill=None**, **sep='t'** )

**Purpose:**

Convert row names (genes) of dataframe using GTF as reference for new name

**Important Notes:**

- A cursory look at the GTF may be required to determine where in the final field the conversion data lies. Position is relative to delimiter in the final field (usually a “;”), so if the new name is in the third position, `new_name_location=2`, etc.
- This function is pulling original and new gene name information from any row where the third field is “gene”. You can run `cat transcripts.gtf | awk '$3 == "gene" | less -S` from the command line of your reference file to identify the positions of the required text fields

Parameters:

**data:** Dataframe to convert rows names

**gtf:** Path and name of gtf reference file

**orig\_name\_label:** Label of original name (usually a “gene\_id “)

**orig\_name\_location:** Position in last column of GTF where relevant data is found (i.e. 0 would be the first sub-string before the first comma, 3 would be the third sub-string after the second comma before the third comma)

**new\_name\_label:** Label of original name (usually “gene\_name “)

**new\_name\_location:** Position in last column of GTF where relevant data is found (i.e. 0 would be the first sub-string before the first comma, 3 would be the third sub-string after the second comma before the third comma)

**refill:** In some cases, where common gene names are unavailable, the dataframe will fill the gene name with the improper field of the GTF. In this case, specify this improper string and these values will be replaced with the original name

**sep:** GTF delimiter (usually tab-delimited)

Returns:

**data:** Pandas dataframe with modified data matrix

Examples:

```
> data
  gene_names  GSM523242 GSM523243 GSM523244 GSM523245 ...
0  YXZ1034C    8.98104   8.59941   8.25395   8.72981   ...
1  YXA7834D    5.84313   6.59168   8.27881   6.64005   ...
2  YXZ349C    6.17189   5.73603   5.55673   5.69374   ...
3  YXZ1994A    6.97009   6.80003   5.56620   7.43816   ...
... ..
> data = xp.convert_names_gtf(data, '/path/to/transcripts.gtf', new_name_label='gene_
↪name \', new_name_location=2)
> data
  gene_names  GSM523242 GSM523243 GSM523244 GSM523245 ...
0  Gene1      8.98104   8.59941   8.25395   8.72981   ...
1  Gene2      5.84313   6.59168   8.27881   6.64005   ...
2  Gene3      6.17189   5.73603   5.55673   5.69374   ...
3  Gene4      6.97009   6.80003   5.56620   7.43816   ...
... ..
```

### 2.4.11 Rename dataframe row names

**xpressplot.rename\_rows ( data, converters, label='index' )**

Purpose:

Rename values in an index (row names) or a column

Parameters:

**data:** Dataframe to rename rows of a column

**converters:** Dataframe where column 0 contains old names and column 1 contains new names

**label:** Name of column to convert names; if ‘index’ is provided, will rename the index of the dataframe

Returns:

**data:** Pandas dataframe with modified data matrix

Examples:

```
> data
      GSM523242 GSM523243 GSM523244 GSM523245 ...
1007_s_at    8.98104   8.59941   8.25395   8.72981 ...
1053_at      5.84313   6.59168   8.27881   6.64005 ...
121_at       6.17189   5.73603   5.55673   5.69374 ...
1294_at      6.97009   6.80003   5.56620   7.43816 ...
...          ...      ...      ...      ...      ...
> conversion_table
   0      1
0  1007_s_at Gene1
1  121_at Gene2
> data = xp.rename_rows(data, conversion_table)
> data
      GSM523242 GSM523243 GSM523244 GSM523245 ...
Gene1    8.98104   8.59941   8.25395   8.72981 ...
1053_at  5.84313   6.59168   8.27881   6.64005 ...
Gene2    6.17189   5.73603   5.55673   5.69374 ...
1294_at  6.97009   6.80003   5.56620   7.43816 ...
...      ...      ...      ...      ...      ...
```

```
> data
   gene_names GSM523242 GSM523243 GSM523244 GSM523245 ...
0  1007_s_at    8.98104   8.59941   8.25395   8.72981 ...
1  1053_at     5.84313   6.59168   8.27881   6.64005 ...
2  121_at      6.17189   5.73603   5.55673   5.69374 ...
3  1294_at     6.97009   6.80003   5.56620   7.43816 ...
...  ...      ...      ...      ...      ...
> conversion_table
   0      1
0  1007_s_at Gene1
1  121_at Gene2
> data = xp.rename_rows(data, conversion_table, label='gene_names')
> data
   gene_names GSM523242 GSM523243 GSM523244 GSM523245 ...
0  Gene1      8.98104   8.59941   8.25395   8.72981 ...
1  1053_at    5.84313   6.59168   8.27881   6.64005 ...
2  Gene2      6.17189   5.73603   5.55673   5.69374 ...
3  1294_at    6.97009   6.80003   5.56620   7.43816 ...
...  ...      ...      ...      ...      ...
```

## 2.5 Normalization and Quality Control

### 2.5.1 RPM (Reads per Million)

**xpressplot.rpm ( data )**

Purpose:

Perform reads per million sample normalization on RNAseq data

Formula:

$$RPM_g = \frac{1e6 \cdot r_{ge}}{\sum_{g=1}^n r_{ge}}$$

Assumptions:

- Dataframe contains raw count data, where samples are along columns and genes across rows

Parameters:

**data:** Input dataframe with counts values

Returns:

**data\_rpm:** Pandas dataframe with RPM-normalized

Examples:

```
> data
      fGSM523242  fGSM523243  fGSM523244  fGSM523245  fGSM523246
Gene1 66          59          1           82          45
Gene2 35          0           7           72          2
Gene3 20          70          85          78          36
Gene4 96          7           93          38          85
Gene5 73          41          92          77          26
> data = xp.rpm(data)
> data
      fGSM523242  fGSM523243  fGSM523244  fGSM523245  fGSM523246
Gene1 227586.2069 333333.3333 3597.1223   236311.2392 231958.7629
Gene2 120689.6552 0.0000      25179.8561  207492.7954 10309.2784
Gene3 68965.5172  395480.2260 305755.3957 224783.8617 185567.0103
Gene4 331034.4828 39548.0226  334532.3741 109510.0865 438144.3299
Gene5 251724.1379 231638.4181 330935.2518 221902.0173 134020.6186
```

## 2.5.2 R/FPKM (Reads/Fragments per Kilobase Million per Million Mapped Reads)

`xpressplot.r_fpkm ( data, gtf, feature_type='exon', identifier='gene_name', sep='t' )`

Purpose:

Perform reads/fragments per kilobase per million mapped reads sample normalization on RNAseq data

Formulae:

$$RPKM_g = \frac{1e9 \cdot r_{ge}}{(\sum_{g=1}^n r_{ge}) \cdot l_{ge}}$$

$$FPKM_g = \frac{1e9 \cdot f_{ge}}{(\sum_{g=1}^n f_{ge}) \cdot l_{ge}}$$

Assumptions:

- Dataframe contains raw count data, where samples are along columns and genes across rows
- As FPKM was developed for paired-end sequencing, it accounts for two reads being able to map to one fragment. Therefore, input counts should have accounted for this is the counting step of sequence quantification. If specifying a paired-end alignment in XPRESSpipe, this will have been accounted for.

- By default, this will take the longest transcript based on combined exon length. If you prefer to use the cumulative exon length of the Ensembl canonical transcript, you must first curate the GTF using `xpresspipe modifyGTF -g transcripts.gtf -l`
- If you performed isoform quantification and wish to length normalize each isoform, provide `identifier='transcript_id'`
- If you would like to normalize based on CDS length, provide `feature_type='CDS'`

Parameters:

**data:** Input dataframe with counts values

**gtf:** GTF reference file path and name

**feature\_type:** Label of feature to use in length normalization

**identifier:** Label for how to group genes/transcripts. If normalizing for a gene, use `gene_name` or `gene_id`. If performing length normalization for isoforms, provide `transcript_id`

**sep:** GTF delimiter (usually tab-delimited)

Returns:

**data\_rpkkm:** Pandas dataframe with R/FPKM-normalized

Examples:

```
> data
      fGSM523242  fGSM523243  fGSM523244  fGSM523245  fGSM523246
Gene1 66         59          1           82          45
Gene2 35         0           7           72          2
Gene3 20         70         85           78          36
Gene4 96         7           93           38          85
Gene5 73         41         92           77          26
> data = xp.r_fpkkm(data, '/path/to/transcripts.gtf')
> data
      fGSM523242  fGSM523243  fGSM523244  fGSM523245  fGSM523246
Gene1 15006.3436  21978.9881   237.1833   15581.6457  15294.6567
Gene2 18516.3632  0.0000     3863.1261  31833.8133  1581.6628
Gene3 1552.2985   8901.5987   6882.0428  5059.5089  4176.8031
Gene4 10220.8992  1221.0702  10328.8988  3381.1932  13527.9835
Gene5 12188.2602  11215.7274  16023.5923  10744.2995  6489.1599
```

### 2.5.3 TPM (Transcripts per Million)

`xpressplot.tpm ( data, gtf, feature_type='exon', identifier='gene_name', sep='t' )`

Purpose:

Perform transcripts per million sample normalization on RNAseq data

Formula:

$$TPM_g = \frac{1e6 \cdot r_{ge}}{(\sum_{g=1}^n (\frac{1e3 \cdot r_{ge}}{l_{ge}})) \cdot l_{ge}}$$

Assumptions:

- Dataframe contains raw count data, where samples are along columns and genes across rows
- By default, this will take the longest transcript based on combined exon length. If you prefer to use the

cumulative exon length of the Ensembl canonical transcript, you must first curate the GTF using `xpresspipe modifyGTF -g transcripts.gtf -l`

- If you performed isoform quantification and wish to length normalize each isoform, provide `identifier='transcript_id'`
- If you would like to normalize based on CDS length, provide `feature_type='CDS'`

Parameters:

**data:** Input dataframe with counts values

**gtf:** GTF reference file path and name

**feature\_type:** Label of feature to use in length normalization

**identifier:** Label for how to group genes/transcripts. If normalizing for a gene, use `gene_name` or `gene_id`. If performing length normalization for isoforms, provide `transcript_id`

**sep:** GTF delimiter (usually tab-delimited)

Returns:

**data\_tpm:** Pandas dataframe with TPM-normalized

## 2.5.4 Batch Normalize

**xpressplot.batch\_normalize ( input\_file, batch\_file )**

Purpose:

Control for batch effects between datasets

Assumptions:

- Requires a properly formatted dataframe for xpressplot usage where samples are normalized previously if desired
- Requires a properly formatted dataframe complying to SVA COMBAT info file (see example below)
- R is installed on your machine and is in your \$PATH
- All input files are tab-delimited (with .txt or .tsv suffix)

Parameters:

**input\_file:** Input dataframe file with values (can be normalized or unnormalized)

**batch\_file:** Input dataframe containing batch effect information, column naming convention must be followed and is case-sensitive

Examples:

```
> data = pd.read_csv('/path/to/expression.tsv', index_col=0)
> data
           s1_rpf  s1_rna  s2_rpf  s2_rna
ENSG00000227232  66.34  59.13   1.90   82.49
ENSG00000240361  35.73   0.00   7.38   72.94
ENSG00000238009  20.02  70.21  85.10   78.87
ENSG00000241860  96.23   7.49  93.49   38.39
ENSG00000187634  73.91  41.28  92.27   77.93
> batch = pd.read_csv('/path/to/batch_info.tsv', index_col=0)
```

(continues on next page)



(continued from previous page)

```

> batch
  Sample Batch
0 s1_rpf batch1
1 s1_rna batch2
2 s2_rpf batch1
3 s2_rna batch2
> xp.batch_normalize('/path/to/expression.tsv', '/path/to/batch_info.tsv')

```

## 2.5.5 Clean Data

**xpressplot.clean\_df ( data, axis=0 )**

Purpose:

Cleans NULL values from axis and clears duplicate indices

Assumptions:

- Requires a properly formatted dataframe for xpressplot usage

Parameters:

**data:** Input dataframe file with values (can be normalized or unnormalized)

**axis:** Axis to clean NaN values from (default: 0, which corresponds to rows)

Returns:

**data\_clean:** Cleaned pandas dataframe

Examples:

```

> data
      s1_rpf  s1_rna  s2_rpf  s2_rna
ENSG00000227232 66.34  59.13   1.90   NA
ENSG00000240361 35.73   0.00   7.38  72.94
Gene2           20.02  70.21  85.10  78.87
Gene2           96.23   7.49  93.49  38.39
ENSG00000187634 73.91   NA     92.27  77.93
> data = xp.clean_df(data)
> data
      s1_rpf  s1_rna  s2_rpf  s2_rna
ENSG00000240361 35.73   0.00   7.38  72.94

```

## 2.5.6 Set Gene Threshold

**xpressplot.threshold ( data, minimum=None, maximum=None )**

Purpose:

Cleans gene axis (assumed to be rows) of genes containing values below or above user-determined thresholds

Assumptions:

- Requires a properly formatted dataframe for xpressplot usage

Parameters:

**data:** Input dataframe file with values (can be normalized or unnormalized)

**minimum:** Minimum value all samples need of a given gene to avoid dropping across all samples

**maximum:** Maximum value all samples can have of a given gene to avoid dropping across all samples

Returns:

**data\_clean:** Cleaned pandas dataframe

Examples:

```
> data
      s1_rpf  s1_rna  s2_rpf  s2_rna
ENSG00000227232 66.34  59.13   1.90  82.49
ENSG00000240361 35.73   0.00   7.38  72.94
ENSG00000238009 20.02  70.21  85.10  78.87
ENSG00000241860 96.23   7.49  93.49  38.39
ENSG00000187634 73.91  41.28  92.27  77.93
> data = xp.threshold(data, minimum=5)
> data
      s1_rpf  s1_rna  s2_rpf  s2_rna
ENSG00000238009 20.02  70.21  85.10  78.87
ENSG00000241860 96.23   7.49  93.49  38.39
ENSG00000187634 73.91  41.28  92.27  77.93
```

### 2.5.7 Prepare xpressplot Dataset

**xpressplot.prep\_data ( data, info, gene\_scale=True, print\_means=False )**

Purpose:

Prepare dataframe for downstream analyses

Assumptions:

- Requires a properly formatted dataframe for xpressplot usage (genes as rows, samples as columns)
- Requires properly formatted xpressplot metadata dataframe

Parameters:

**data:** xpressplot formatted dataframe of expression values

**info:** xpressplot formatted sample info dataframe

**gene\_scale:** Scale genes (rows) of data

**print\_means:** Print means for each sample verification

Returns:

**data\_normalized:** Normalized pandas dataframe

**data\_labeled:** Labeled pandas dataframe

## 2.5.8 Check Sample Expression Distributions

`xpressplot.check_samples ( data )`

Purpose:

Visualize gene expression distributions on a sample-by-sample basis

Assumptions:

- Requires a properly formatted dataframe for xpressplot usage

Parameters:

**data:** Input dataframe file with values (can be normalized or unnormalized)

Returns:

Boxplot with samples on the x-axis and lump expression distributions for all genes in that sample

Examples:

```
> xp.check_samples(data)
```

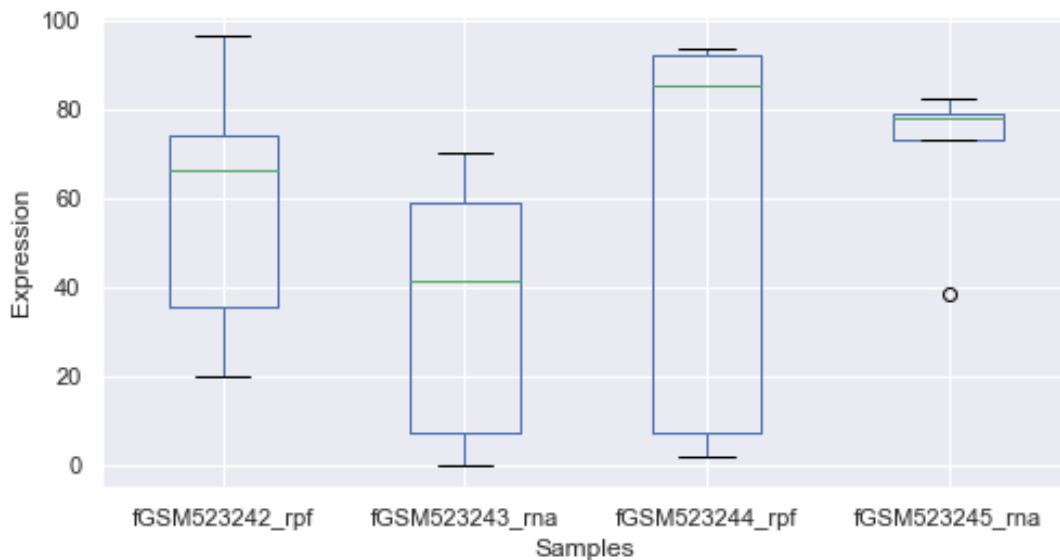

## 2.5.9 Microarray Probe Collapse

`xpressplot.probe_collapse ( data, reference, gene_list=None, no_multimappers=True )`

Purpose:

Remove multimapping probes and collapse probes mapping to the same gene by averaging the values for those probes per sample

### Assumptions:

- Requires a properly formatted dataframe for xpressplot usage
- Assumes GPL .txt file from NCBI is tab delimited

### Parameters:

**data:** Input dataframe file with values (can be normalized or unnormalized)

### Returns:

**data\_collapsed:** Pandas dataframe file probes collapsed and the corresponding gene names listed

### Examples:

```
> data
      fGSM523242  fGSM523243  fGSM523244  fGSM523245  fGSM523246
1007_s_at  66           59           1           82           45
1053_at    35           0            7           72           2
121_at     20           70           85           78           36
218024_at  96           7            93          38           85
240362_at  73           41           92           77           26
> probe_collapse = xp.probe_collapse(probe_test, '/path/to/gpl_ref.txt')
> probe_collapse
      fGSM523242  fGSM523243  fGSM523244  fGSM523245  fGSM523246
MPC1  84.5        24.0        92.5        57.5        55.5
PAX8  20.0        70.0        85.0        78.0        36.0
RFC2  35.0         0.0         7.0         72.0         2.0
```

```
> data
      fGSM523242  fGSM523243  fGSM523244  fGSM523245  fGSM523246
1007_s_at  66           59           1           82           45
1053_at    35           0            7           72           2
121_at     20           70           85           78           36
218024_at  96           7            93          38           85
240362_at  73           41           92           77           26
> probe_collapse = xp.probe_collapse(probe_test, '/path/to/gpl_ref.txt', no_
↳multimappers=False)
> probe_collapse
      fGSM523242  fGSM523243  fGSM523244  fGSM523245  fGSM523246
DDR1 /// MIR4640  66.0        59.0         1.0         82.0         45.0
MPC1              84.5        24.0        92.5        57.5        55.5
PAX8              20.0        70.0        85.0        78.0        36.0
RFC2              35.0         0.0         7.0         72.0         2.0
```

## 2.6 Analysis

The following commands rely heavily on the matplotlib (DOI:10.5281/zenodo.2577644) and seaborn (DOI:10.5281/zenodo.883859) libraries, but have been modified in many cases for ease of plotting given the formatting of xpressplot datasets.

### 2.6.1 Formatting Notes

## Sample Color Palette

A dictionary of experiment groups with corresponding RGB values for colors (use of common color names is not currently tested)

Examples:

```
sample_colors = {'Adenocarcinoma': (0.5725490196078431, 0.5843137254901961, 0.
↪5686274509803921),
                 'Adenoma': (0.8705882352941177, 0.5607843137254902, 0.0196078431372549),
                 'Normal': (0.00784313725490196, 0.6196078431372549, 0.
↪45098039215686275) }
```

## 2.6.2 Single-gene Analysis

**xpressplot.gene\_overview** ( data, info, gene\_name, palette, order=None, grid=False, whitegrid=False, save\_fig=None, dpi=600, bbox\_inches='tight' )

Purpose:

Create a boxplot with overlaid swarmplot for each experiment group for a particular gene

Assumptions:

- Dataframe and metadata are properly formatted for use with xpressplot

Parameters:

**data**: xpressplot-formatted dataframe (Required)

**info**: xpressplot formatted sample info dataframe (Required)

**gene\_name**: Name of gene to plot (Required)

**palette**: Dictionary of matplotlib compatible colors for samples (Required)

**order**: List of experiment groups in order to plot (Default: None)

**grid**: Set to True to add gridlines (default: False)

**whitegrid**: Set to True to create white background in figure (default: Grey-scale)

**save\_fig**: Full file path, name, and extension for file output (default: None)

**dpi**: Set DPI for figure output (default: 600)

**bbox\_inches**: Matplotlib bbox\_inches argument (default: 'tight'; useful for saving images and preventing text cut-off)

Examples:

```
>>> xp.gene_overview(data, metadata, gene_name='SEC62', palette=sample_colors,
order=['Normal', 'Adenoma', 'Adenocarcinoma'])
```

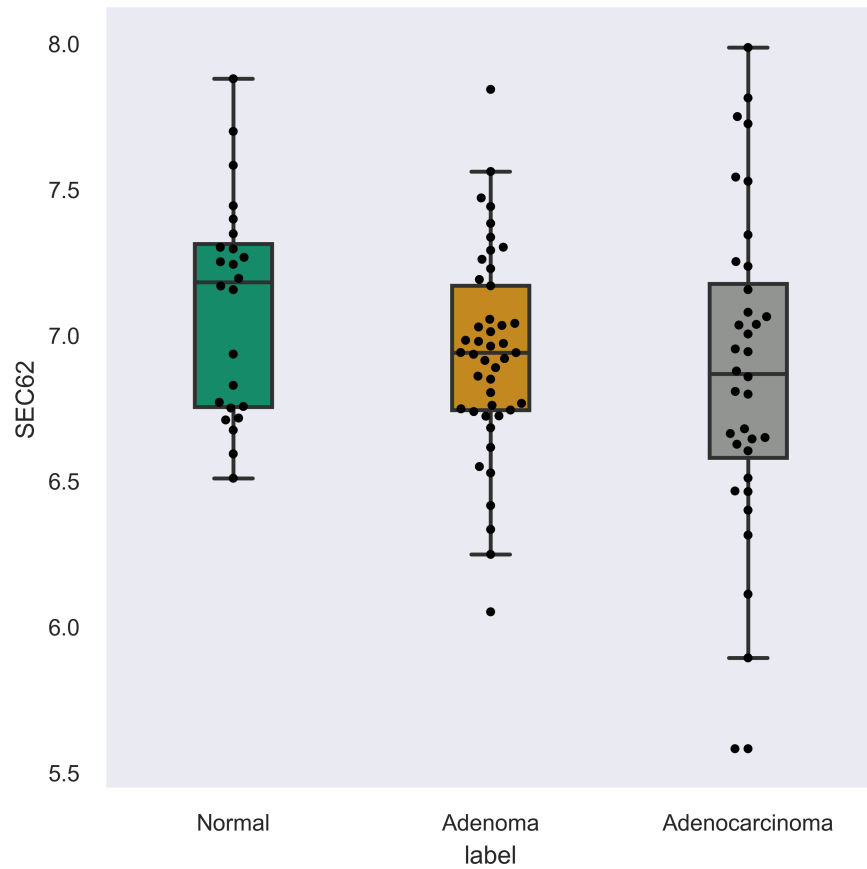

```
>>> xp.gene_overview(data, metadata, 'CCL5', sample_colors, grid=True, whitegrid=True)
```

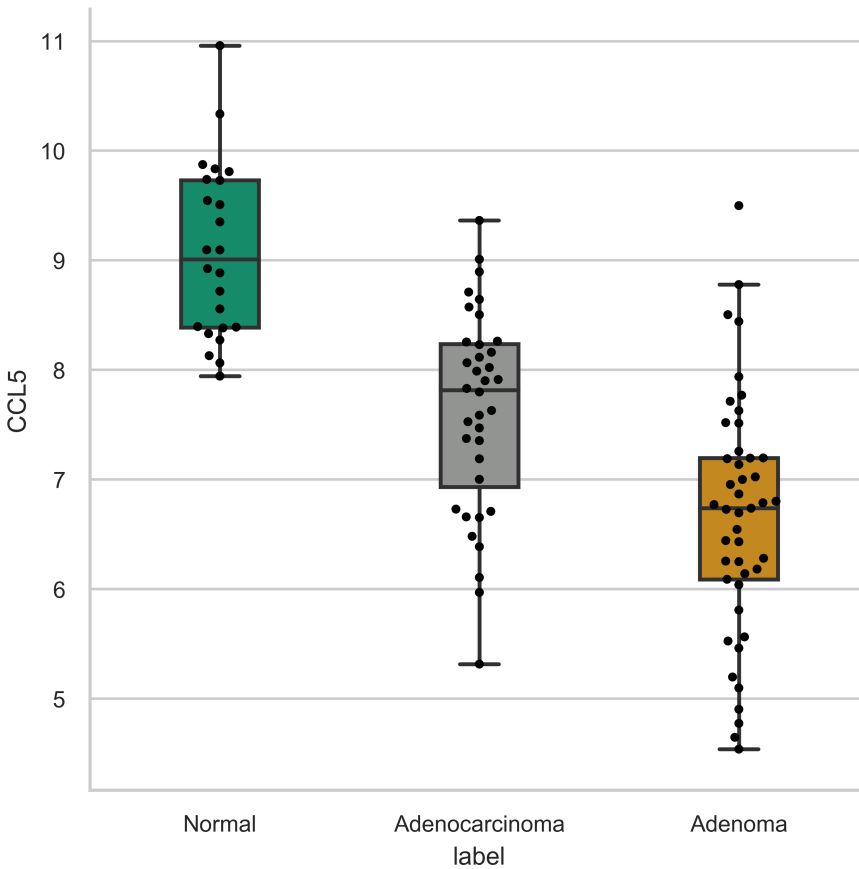

### 2.6.3 Multi-gene Analysis

`xpressplot.multigene_overview` ( `data`, `info`, `palette=None`, `gene_list=None`, `order=None`, `scale=None`, `title=None`, `grid=False`, `whitegrid=False`, `save_fig=None`, `dpi=600`, `bbox_inches='tight'` )

Purpose:

Create violin plots of a subset of gene expressions or total gene expression by experiment group

Assumptions:

- Dataframe and metadata are properly formatted for use with xpressplot

Parameters:

**data**: xpressplot-formatted dataframe (Required)

**info**: xpressplot formatted sample info dataframe (Required)

**palette**: Dictionary of matplotlib compatible colors for samples (Default: None)

**gene\_list**: List of genes to plot (default: None; plots total gene expression for experiment group)

**order**: List of experiment groups in order to plot (Default: None)

**scale**: Seaborn violinplot scale argument (default: 'area')

**title**: Plot title (default: None)

**grid**: Set to True to add gridlines (default: False)

**whitegrid**: Set to True to create white background in figure (default: Grey-scale)

**save\_fig:** Full file path, name, and extension for file output (default: None)

**dpi:** Set DPI for figure output (default: 600)

**bbox\_inches:** Matplotlib bbox\_inches argument (default: 'tight'; useful for saving images and preventing text cut-off)

Examples:

```
>>> xp.multigene_overview(data, metadata, palette=sample_colors,  
gene_list=['SEC62', 'CCL5', 'STX6'])
```

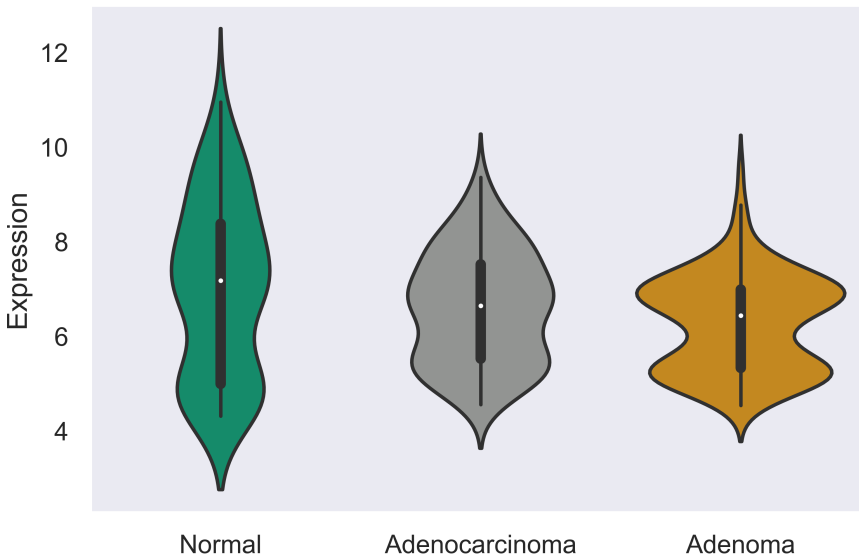

```
>>> xp.gene_overview(data, metadata, palette=sample_colors, gene_list=['STX6'],  
order=['Normal', 'Adenoma', 'Adenocarcinoma'])
```

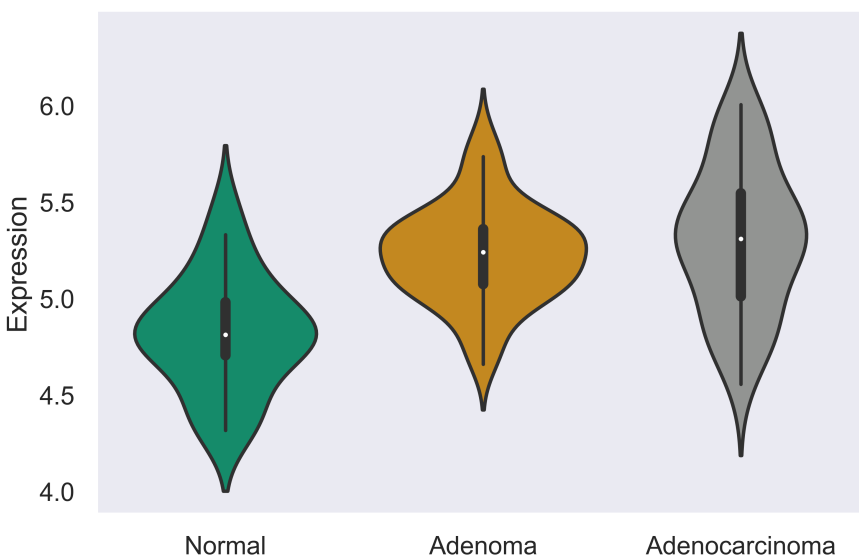



## 2.6.4 Heatmap

```
xpressplot.heatmap ( data, info, sample_palette=None, gene_info=None, gene_palette=None, gene_list=None,
col_cluster=True, row_cluster=False, metric='euclidean', method='centroid', font_scale=0.8,
cmap=jakes_cmap, center=0, xticklabels=True, yticklabels=True, linewidths=0, linecolor='#DCDCDC',
cbar_kws=None, figsize=(16,6.5), save_fig=None, dpi=600, bbox_inches='tight' )
```

Purpose:

Create clustered heatmaps for gene expression dataframe

Assumptions:

- Dataframe and metadata are properly formatted for use with xpressplot

Parameters:

**data:** xpressplot-formatted dataframe (Required)

**info:** xpressplot formatted sample info dataframe (Required)

**sample\_palette:** Dictionary of matplotlib compatible colors for samples (Default: None)

**gene\_info:** xpressplot formatted metadata matrix for genes (column0) and gene groups (column1)

**gene\_palette:** Dictionary of labels and colors for plotting, or valid seaborns clustermap col\_colors option

**gene\_list:** List of genes to plot (default: None; plots total gene expression for experiment group)

**col\_cluster:** Cluster columns/samples (default: True)

**row\_cluster:** Cluster rows/genes (default: False)

**metric:** Seaborn clustermap argument (default: 'euclidean')

**method:** Seaborn clustermap argument (default: 'centroid')

**font\_scale:** Aspect by which to scale text (default: 0.8)

**cmap:** Matplotlib colorbar valid entry (default: jakes\_cmap; a color-blind friendly color palette)

**center:** Value at which to center the color scale (default: 0)

**xticklabels:** Include x-axis labels (default: True)

**yticklabels:** Include y-axis labels (default: True)

**linewidths:** Thickness of grid lines (default: 0; no grid-lines printed)

**linecolor:** Grid line color (default: '#DCDCDC'; or white)

**cbar\_kw:** Matplotlib colorbar additional arguments (default: None)

**figsize:** Figure size tuple; width, height (default: (16,6.5))

**save\_fig:** Full file path, name, and extension for file output (default: None)

**dpi:** Set DPI for figure output (default: 600)

**bbox\_inches:** Matplotlib bbox\_inches argument (default: 'tight'; useful for saving images and preventing text cut-off)

Examples:

```
>>> xp.heatmap(data, metadata, sample_palette=sample_colors, gene_list=['SEC62', 'STX6
↳', 'CCL5'],
cbar_kws={'label': 'z-score'}, figsize=(20,2))
```

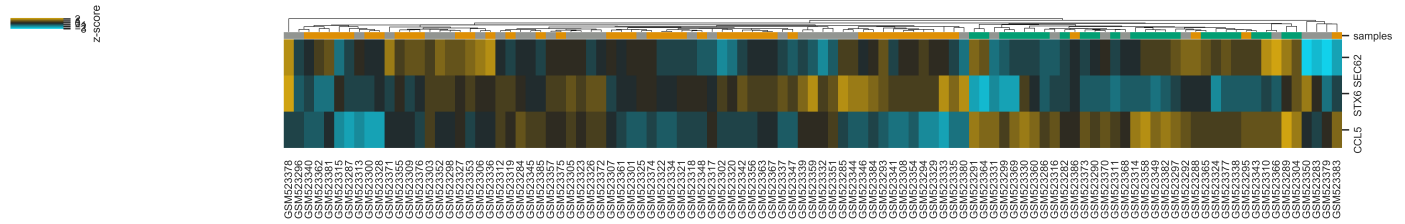

```
>>> xp.heatmap(data, metadata, sample_palette=sample_colors, gene_palette=gene_colors,
gene_info=gene_metadata, gene_list=['SEC62','STX6','CCL5'], figsize=(20,2),
row_cluster=True)
```

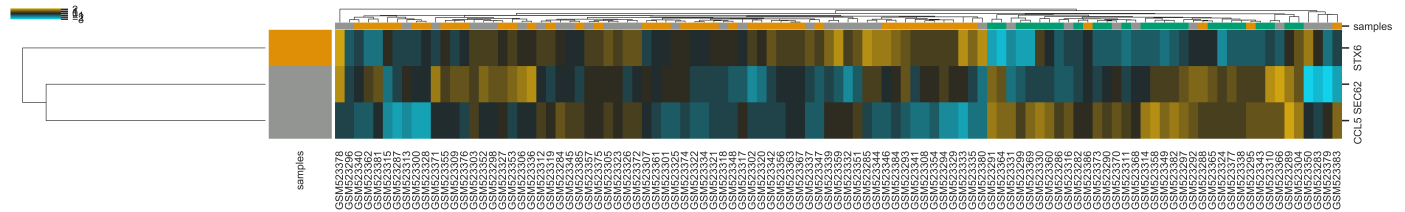

```
>>> xp.heatmap(data, metadata, sample_palette=sample_colors, xticklabels=True,
linewidths=.5,
linecolor='black', gene_list=['SEC62','STX6','CCL5'], figsize=(20,2))
```

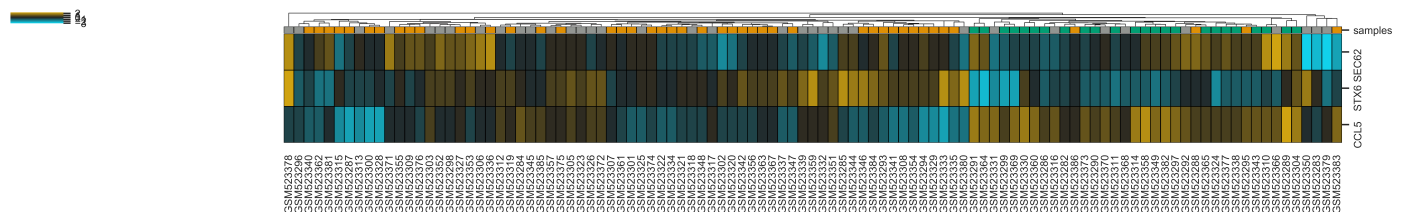

### 2.6.5 Scatterplot

xpressplot.scatter ( data, info, x, y, palette=None, add\_linreg=False, order\_legend=None, title=None, alpha=1, highlight\_points=None, highlight\_color='DarkRed', highlight\_names=None, alpha\_highlights=1, size=30, y\_threshold=None, x\_threshold=None, threshold\_color='b', label\_points=None, grid=False, whitegrid=False, save\_fig=None, dpi=600, bbox\_inches='tight' )

Purpose:

Create scatterplot with the option to include a linear least-squares regression fit of the data

Assumptions:

- Dataframe and metadata are properly formatted for use with xpressplot

Parameters:

- data:** xpressplot-formatted dataframe (Required)
- info:** xpressplot formatted sample info dataframe (Required)
- x:** X-axis gene or other metric (Required)
- y:** Y-axis gene or other metric (Required)
- palette:** Dictionary of matplotlib compatible colors for samples (Default: None)
- add\_linreg:** Add a linear least-squares regression line (default: False)

- order\_legend:** List of experiment groups in order to display on legend (Default: None)
- title:** Plot title (default: None)
- alpha:** Opacity percentage for scatter plot
- highlight\_points:** List of indices to highlight on scatterplot (if desired to plot multiple sets in different colors, lists of lists can be provided)
- highlight\_color:** Color or ordered list of colors to plot highlighted points (if multiple lists are being highlighted, pass colors in same order as a list)
- highlight\_names:** Ordered list of names to use in legend (must follow order provided for highlight\_points and highlight\_color)
- alpha\_highlights:** Opacity percentage for highlighted elements of scatter plot
- size:** Marker size
- y\_threshold:** Include a y-axis threshold dotted line (default: None). If a list is provided, each will be plotted
- x\_threshold:** Include a x-axis threshold dotted line (default: None). If a list is provided, each will be plotted
- threshold\_color:** Threshold line color (default: 'b'; black)
- label\_points:** A dictionary where keys are labels and values are a two-element list as [x-coordinate, y-coordinate]
- grid:** Set to True to add gridlines (default: False)
- whitegrid:** Set to True to create white background in figure (default: Grey-scale)
- save\_fig:** Full file path, name, and extension for file output (default: None)
- dpi:** Set DPI for figure output (default: 600)
- bbox\_inches:** Matplotlib bbox\_inches argument (default: 'tight'; useful for saving images and preventing text cut-off)

Examples:

```
>>> xp.scatter(data, metadata, 'SEC62', 'STX6', palette=geo_colors, add_linreg=True,
               order_legend=[1, 3, 2], alpha=.7)
```

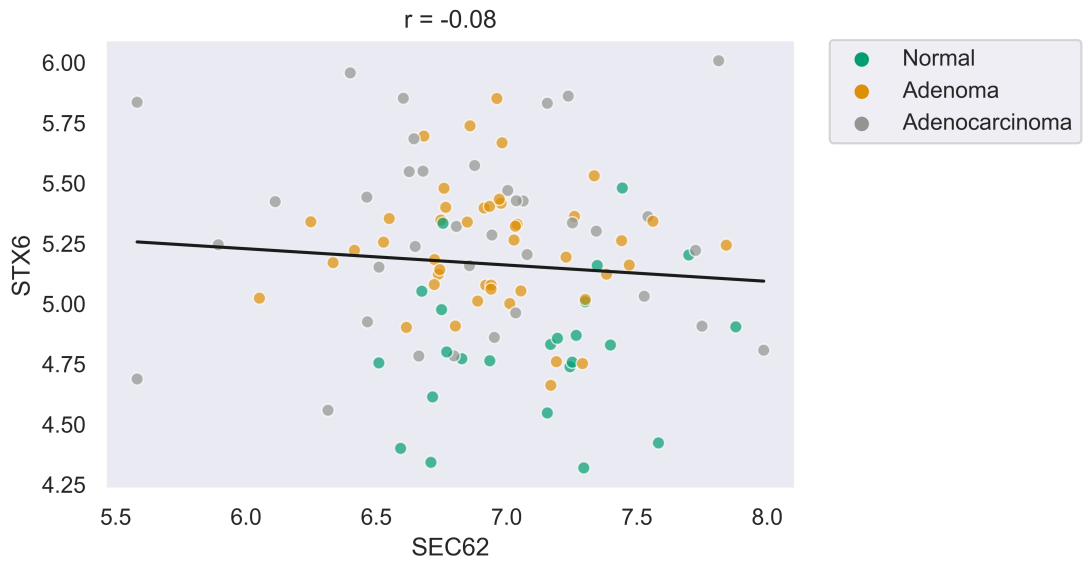

```
>>> xp.scatter(data, metadata, 'SEC62', 'STX6', palette=geo_colors, add_linreg=False,
               alpha=.7)
```

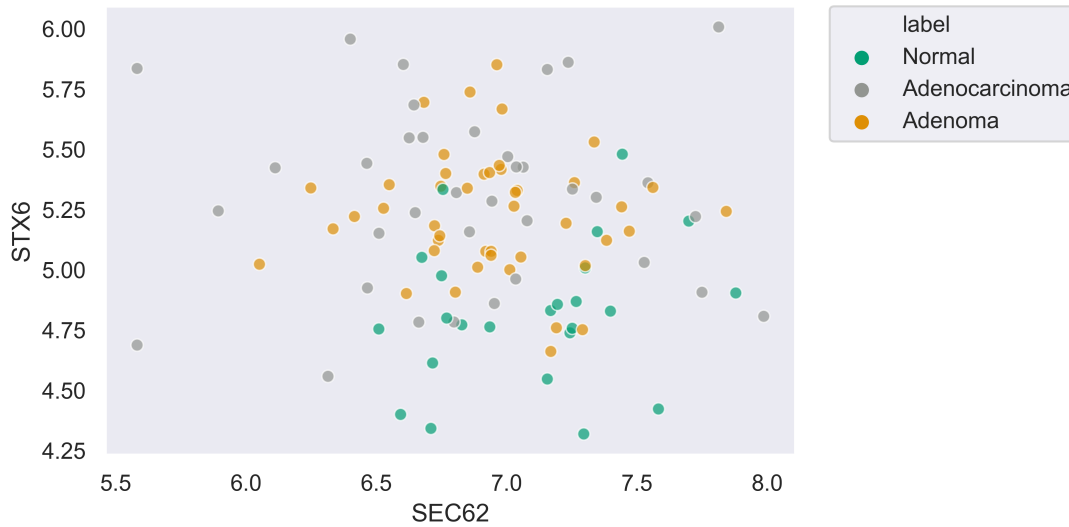

```
>>> xp.scatter(data, metadata, 'SEC62', 'STX6', palette=geo_colors, add_linreg=True,
               alpha=.2,
               title='this is a title', y_threshold=5, x_threshold=[7])
```

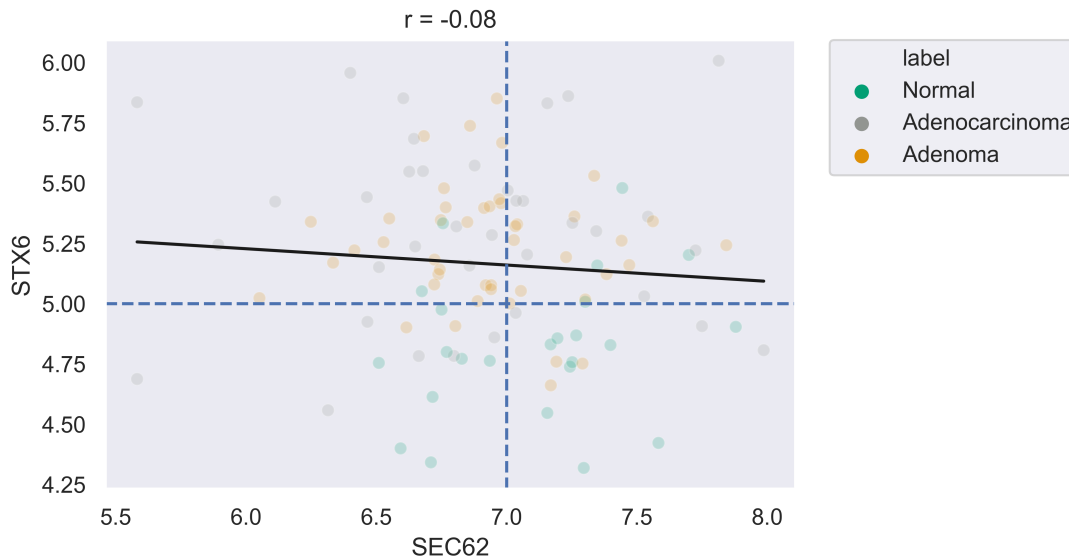

## 2.6.6 RNA Volcano Plot

`xpressplot.rna_volcano` ( `file`, `order_legend=None`, `title=None`, `alpha=1`, `highlight_points=None`, `highlight_color='DarkRed'`, `highlight_names=None`, `alpha_highlights=1`, `size=30`, `y_threshold=None`, `x_threshold=None`, `threshold_color='b'`, `label_points=None`, `grid=False`, `whitegrid=False`, `interactive=False`, `save_fig=None`, `dpi=600`, `bbox_inches='tight'` )

Purpose:

Create volcano plot with non-normally distributed data (RNA-seq). See `Volcano Plot` for examples.

Assumptions:

- file is a DESeq2-output table
- Note: Many of the options will be non-functional when using interactive mode

**file:** Path and file name to DESeq2-output table

**order\_legend:** List of experiment groups in order to display on legend (Default: None)

**title:** Plot title (default: None)

**alpha:** Opacity percentage for scatter plot

**highlight\_points:** List of indices to highlight on scatterplot (if desired to plot multiple sets in different colors, lists of lists can be provided)

**highlight\_color:** Color or ordered list of colors to plot highlighted points (if multiple lists are being highlighted, pass colors in same order as a list)

**highlight\_names:** Ordered list of names to use in legend (must follow order provided for highlight\_points and highlight\_color). Must use if highlighting points.

**alpha\_highlights:** Opacity percentage for highlighted elements of scatter plot

**size:** Marker size

**y\_threshold:** Include a y-axis threshold dotted line (default: None). If a list is provided, each will be plotted

**x\_threshold:** Include a x-axis threshold dotted line (default: None). If a list is provided, each will be plotted

**threshold\_color:** Threshold line color (default: 'b'; black)

**label\_points:** A dictionary where keys are labels and values are a two-element list as [x-coordinate, y-coordinate]

**grid:** Set to True to add gridlines (default: False)

**whitegrid:** Set to True to create white background in figure (default: Grey-scale)

**figsize:** Set figure size dimensions

**interactive:** Set as True to create interactive scatter plot (if using this option and saving the output, be sure to include a `html` suffix in the file name)

**save\_fig:** Full file path, name, and extension for file output (default: None)

**dpi:** Set DPI for figure output (default: 600)

**bbox\_inches:** Matplotlib `bbox_inches` argument (default: 'tight'; useful for saving images and preventing text cut-off)

### 2.6.7 Volcano Plot

```
xpressplot.volcano ( data, info, label_comp, label_base, order_legend=None, title=None, alpha=1,
highlight_points=None, highlight_color='DarkRed', highlight_names=None, alpha_highlights=1, size=30,
y_threshold=None, x_threshold=None, threshold_color='b', save_threshold_hits=None,
save_threshold_hits_delimiter=',', label_points=None, grid=False, whitegrid=False, return_data=False,
figsize=(10,10), interactive=False, save_fig=None, dpi=600, bbox_inches='tight' )
```

Purpose:

Create volcano plot with normally distributed data

Assumptions:

- Dataframe and metadata are properly formatted for use with xpressplot
- Note: Many of the options will be non-functional when using interactive mode

Parameters:

**data:** xpressplot-formatted dataframe, sample normalized (Required)

**info:** xpressplot formatted sample info dataframe (Required)

**label\_comp:** Experiment group name to act as comparison group (Required)

**label\_base**: Experiment group name to act as base group (Required)

**order\_legend**: List of experiment groups in order to display on legend (Default: None)

**title**: Plot title (default: None)

**alpha**: Opacity percentage for scatter plot

**highlight\_points**: List of indices to highlight on scatterplot (if desired to plot multiple sets in different colors, lists of lists can be provided)

**highlight\_color**: Color or ordered list of colors to plot highlighted points (if multiple lists are being highlighted, pass colors in same order as a list)

**highlight\_names**: Ordered list of names to use in legend (must follow order provided for `highlight_points` and `highlight_color`). Must use if highlighting points.

**alpha\_highlights**: Opacity percentage for highlighted elements of scatter plot

**size**: Marker size

**y\_threshold**: Include a y-axis threshold dotted line (default: None). If a list is provided, each will be plotted

**x\_threshold**: Include a x-axis threshold dotted line (default: None). If a list is provided, each will be plotted

**threshold\_color**: Threshold line color (default: 'b'; black)

**save\_threshold\_hits**: Include path and filename to save points out of bounds of the threshold points (greater than the Y-threshold, and outside of the X-threshold range)

**save\_threshold\_hits\_delimiter**: Delimiter to use for saving threshold hits (default: ';'; .csv)

**label\_points**: A dictionary where keys are labels and values are a two-element list as [x-coordinate, y-coordinate]

**grid**: Set to True to add gridlines (default: False)

**whitegrid**: Set to True to create white background in figure (default: Grey-scale)

**return\_data**: Set as True to return dataframe with log2 Fold Changes and -log10 P-values added

**figsize**: Set figure size dimensions

**interactive**: Set as True to create interactive scatter plot (if using this option and saving the output, be sure to include a `html` suffix in the file name)

**save\_fig**: Full file path, name, and extension for file output (default: None)

**dpi**: Set DPI for figure output (default: 600)

**bbox\_inches**: Matplotlib `bbox_inches` argument (default: 'tight'; useful for saving images and preventing text cut-off)

Examples:

```
>>> xp.volcano(data, metadata, 'Adenoma', 'Normal', highlight_points=['STX6', 'SCARB1',  
↪ 'CCL5'])
```

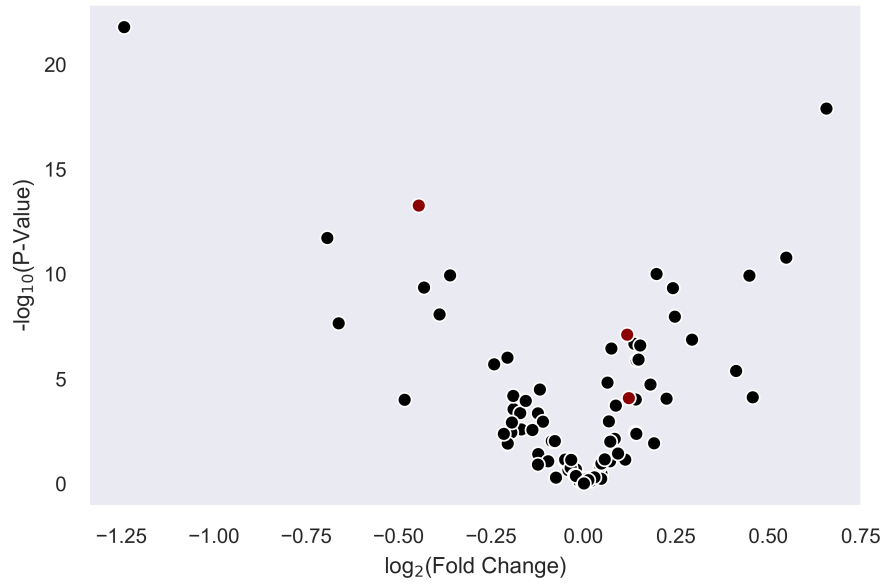

```
>>> xp.volcano(data, metadata, 'Adenoma', 'Normal', highlight_points=['STX6', 'SCARB1',
↪ 'CCL5'],
y_threshold=2, x_threshold=[-1,1], save_threshold_hits=save_threshold)
```

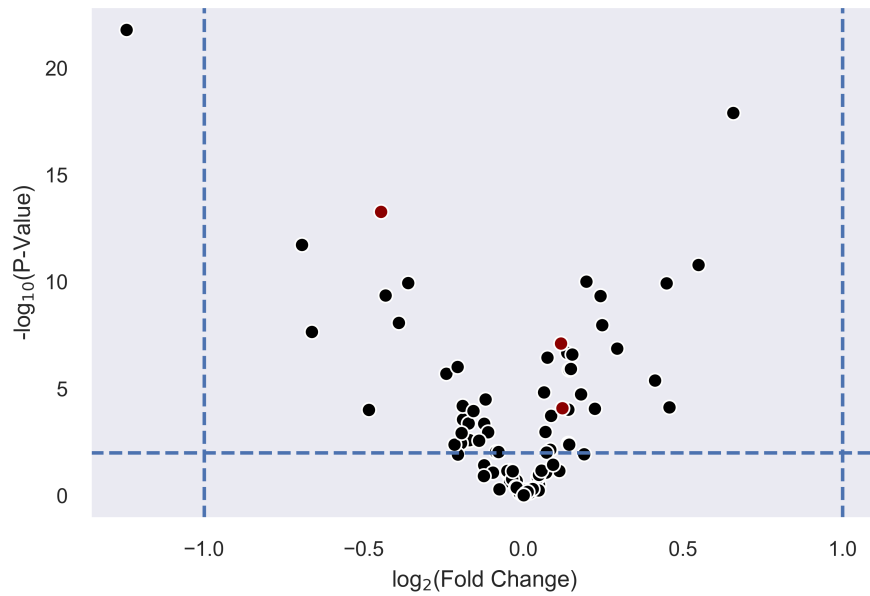

```
>>> xp.volcano(data, metadata, 'Adenoma', 'Normal', highlight_points=[['STX6', 'SCARB1
↪ ', 'CCL5'], ['BEST4']],
highlight_color=['blue', 'red'], alpha=.3, y_threshold=2, x_threshold=[-1,1],
label_points={'BEST4': [-1.24288077425345, 21.782377963035827]})
```

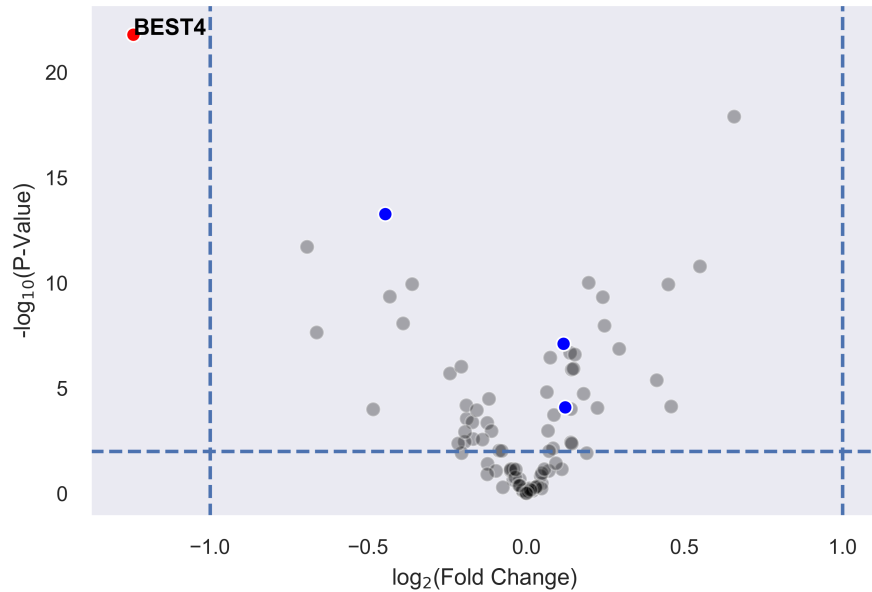

## 2.6.8 Linear Regression

`xpressplot.linreg ( data, gene_name, save_file, delimiter=',' )`

Purpose:

Calculate r, r<sup>2</sup> values, and p-values for every gene against target gene for given dataset

Assumptions:

- Dataframe is properly formatted for use with xpressplot

Parameters:

**data:** xpressplot-formatted dataframe, sample normalized (Required)

**gene\_name:** Target gene name to run genome-wide comparisons against

**save\_file:** Full file path, name, and extension for file output (default: None)

**delimiter:** Field separator for output file (default: ',')

Examples:

```
>>> xp.linreg(data, 'STX6', 'path/to/output.csv', delimiter=',')
```

## 2.6.9 Jointplot

`xpressplot.jointplot ( data, info, x, y, kind='reg', palette=None, order=None, title_pad=0, title_pos='right', grid=False, whitegrid=False, save_fig=None, dpi=600, bbox_inches='tight' )`

Purpose:

Create linear regression scatterplot that displays r value, confidence, and density distributions for axes



**Assumptions:**

- Dataframe and metadata are properly formatted for use with xpressplot

**Parameters:**

**data:** xpressplot-formatted dataframe (Required)

**info:** xpressplot formatted sample info dataframe (Required)

**x:** X-axis gene or other metric (Required)

**y:** Y-axis gene or other metric (Required)

**kind:** Type of plot to create from the seaborn's jointplot function (default: 'reg'; linear regression)

**palette:** Dictionary of matplotlib compatible colors for samples (Default: None)

**order:** List of experiment groups in order to display on legend (Default: None)

**title\_pad:** Amount of padding to give title from default position (default: 0)

**title\_pos:** Title position (default: 'right'; other options: 'center', 'left')

**grid:** Set to True to add gridlines (default: False)

**whitegrid:** Set to True to create white background in figure (default: Grey-scale)

**save\_fig:** Full file path, name, and extension for file output (default: None)

**dpi:** Set DPI for figure output (default: 600)

**bbox\_inches:** Matplotlib bbox\_inches argument (default: 'tight'; useful for saving images and preventing text cut-off)

**Examples:**

```
>>> xp.jointplot(geo_labeled, meta, 'STX6', 'STX6', kind='reg')
```

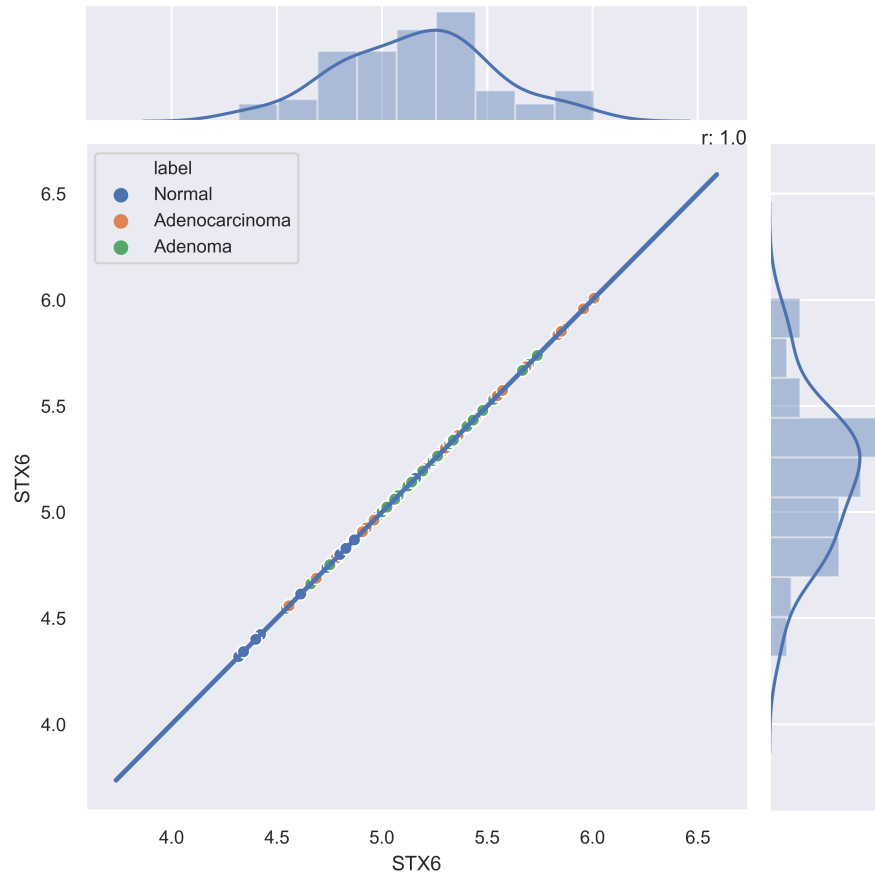

```
>>> xp.jointplot(geo_labeled, meta, 'STX6', 'CCL5', kind='reg', palette=geo_colors,
order=['Normal','Adenoma','Adenocarcinoma'], title_pad=-305, title_pos='center')
```

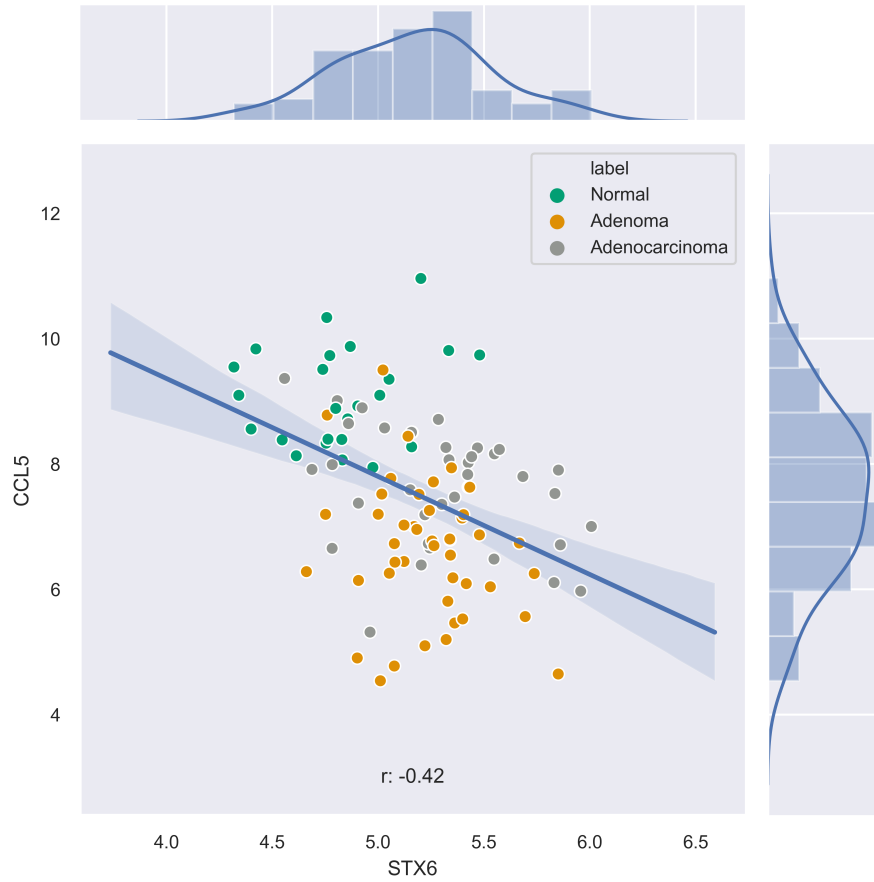

```
>>> xp.jointplot(geo_labeled, meta, 'STX6', 'CCL5', kind='kde', palette=geo_colors,
order=['Normal', 'Adenoma', 'Adenocarcinoma'])
```

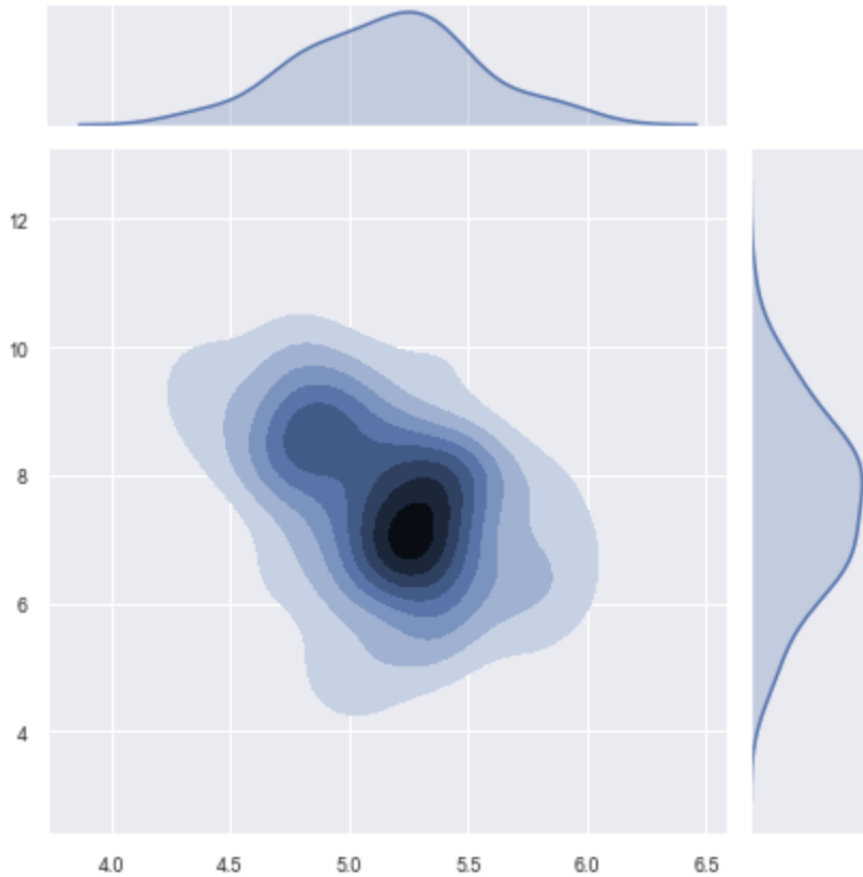

### 2.6.10 PCA (2-D, 3-D, Interactive)

`xpressplot.pca ( data, info, palette, grouping='samples', gene_list=None, gene_labels=False, _3d_pca=False, principle_components=[1,2], n_components=10, ci=2, scree_only=False, save_scree=False, size=30, order_legend=None, title=None, fig_size=(10,10), grid=False, whitegrid=False, save_fig=None, dpi=600, bbox_inches='tight', return_pca=False, plotly_login=None )`

Purpose:

Plot a 2-D PCA with confidence intervals or a 3-D PCA with no confidence intervals

Assumptions:

- Dataframe and metadata are properly formatted for use with xpressplot

Parameters:

**data:** xpressplot-formatted dataframe, sample normalized (Required)

**info:** xpressplot formatted sample info dataframe (Required)

**palette:** Dictionary of matplotlib compatible colors for samples (Default: None)

**grouping:** What axis of the data to perform the analysis (default: 'samples' or columns; other options: 'genes', not yet implemented)

**gene\_list:** List of genes to perform PCA across

**gene\_labels:** Option for grouping='genes', not currently implemented

**\_3d\_pca**: Set to True to create 3-D PCA plotting principle components 1-3 (default: False)  
**principle\_components**: List of principle components to plot for 2-D PCA  
**n\_components**: Number of components to evaluate in the general analysis  
**ci**: Confidence intervals to plot (i.e. 1 == CI1 == 68%, 2 == CI2 == 95%, 3 == CI3 == 99%)  
**scree\_only**: Only evaluate scree plot for n\_components and exit  
**save\_scree**: Output scree plot to path and filename (automatically appends '\_scree.pdf')  
**size**: Marker size  
**order\_legend**: List of experiment groups in order to display on legend (Default: None)  
**title**: Plot title (default: None)  
**fig\_size**: Figure size tuple; width, height (default: (16,6.5))  
**grid**: Set to True to add gridlines (default: False)  
**whitegrid**: Set to True to create white background in figure (default: Grey-scale)  
**save\_fig**: Full file path, name, and extension for file output (default: None)  
**dpi**: Set DPI for figure output (default: 600)  
**bbox\_inches**: Matplotlib bbox\_inches argument (default: 'tight'; useful for saving images and preventing text cut-off)  
**return\_pca**: Set as True to return dataframe with principle component values added  
**plotly\_login**: Include plotly login username and password to create an interactive plot, ex: ['username','password'] – not yet implemented

Notes:

- Exporting 3-D static PCA plots is not currently supported

Examples:

```
>>> xp.pca(geo_labeled, meta, geo_colors, grouping='samples', gene_list=None, gene_
↳ labels=False,
    ci=2, principle_components=[1,2], n_components=10, _3d_pca=False, scree_
↳ only=False,
    save_scree=None, size=10)
```

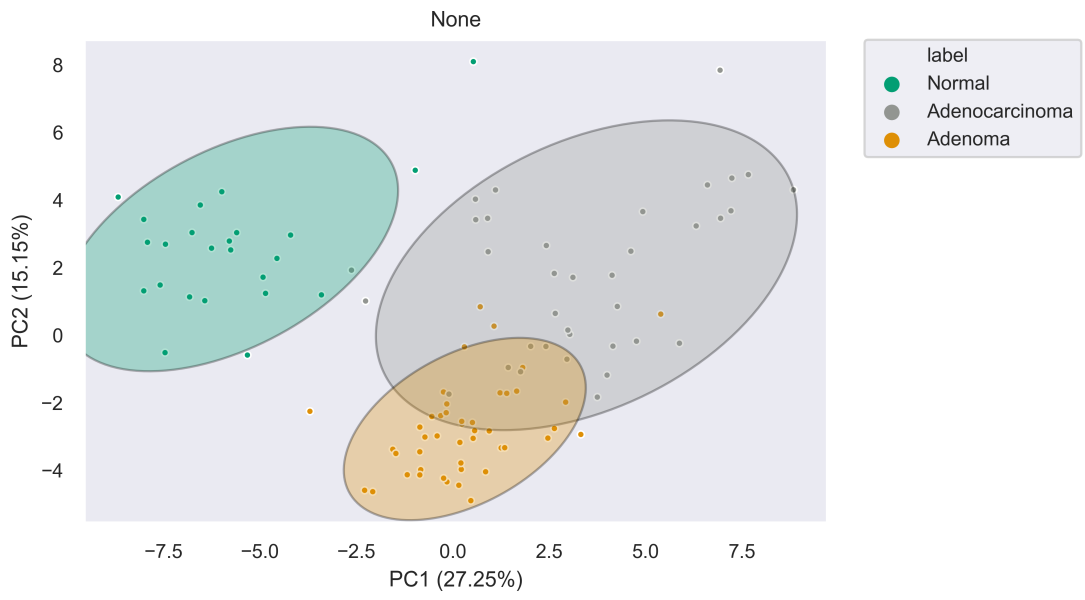

```
>>> xp.pca(geo_labeled, meta, geo_colors, _3d_pca=True, order_legend=[1,3,2], save_
↳ fig=pca_file)
```

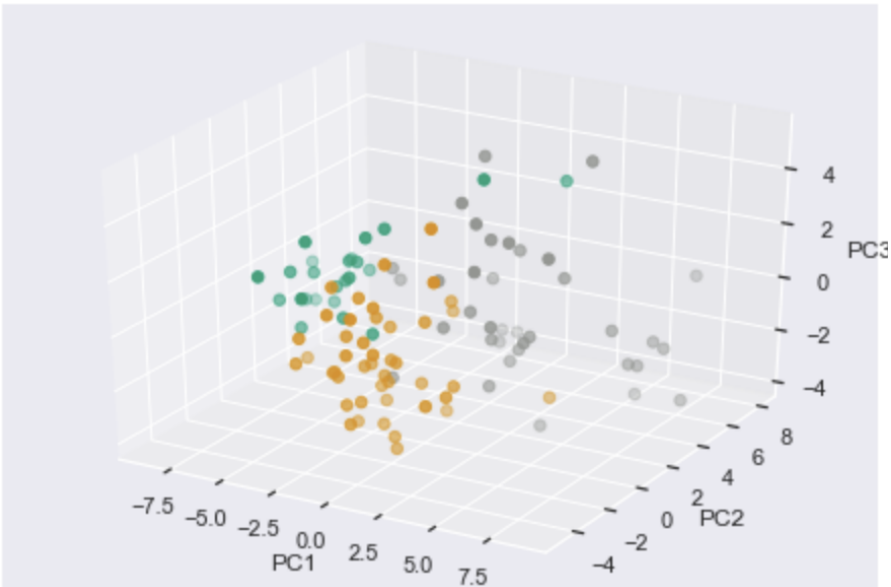

```
>>> xp.pca(geo_labeled, meta, geo_colors, _3d_pca=False, scree_only=True, save_
↳ scree=True)
```

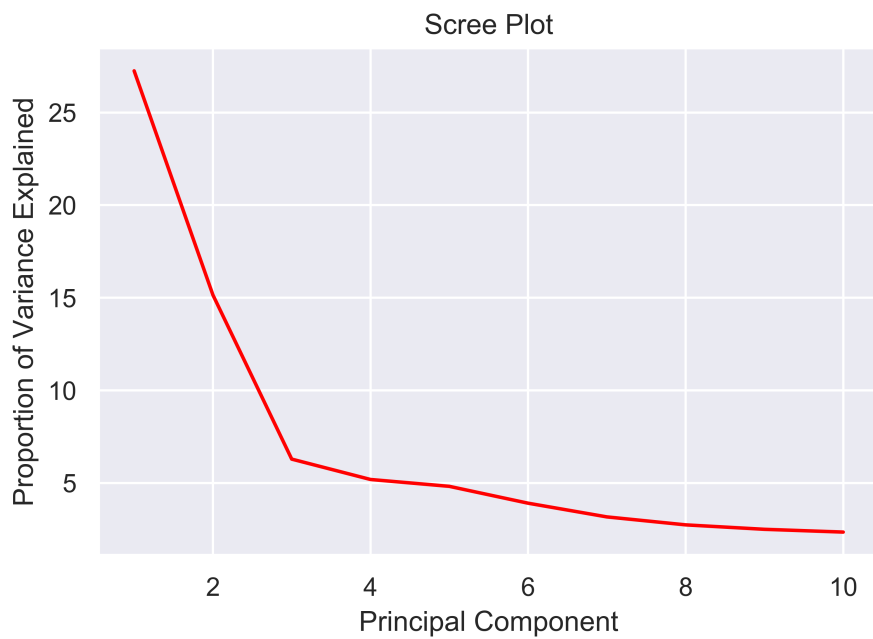

## 2.7 Updates

### 2.7.1 v0.2.2

- Fixes backend checks for matplotlib in tests and for HPC usage
- Updated library normalization equations
- Added administrative files

### 2.7.2 v0.2.1-beta

- Push manuscript submission version to PyPi





## CHAPTER 3

---

### License

---

XPRESSplot is freely available under a GNU General Public License (v3.0).



## CHAPTER 4

---

Questions?

---

If you have questions, requests, or bugs to report, please use the [Github issues forum](#).
